# Supplementary material
Source: PubMed Central journal article supplement (PMC3383771)
Supplement: NIHMS352350-supplement-supplement_1.pdf [file NIHMS352350-supplement-supplement_1.pdf]

## SUPPLEMENTAL TABLES

Table 5a. Regression coefficients, constants, and standard errors for the initial regression models among the normative sample of HIV-uninfected women

|                            | Age      | Years of education | WRAT-3   | African American | Hispanic |
|----------------------------|----------|--------------------|----------|------------------|----------|
| Trails A time <sup>a</sup> | .006***  | -.012*             | -.006*   | .163*            | .099     |
| Trails B time <sup>a</sup> | .009***  | -.019*             | -.017*** | .088*            | .099     |
| Symbol Digit total         | -.349*** | .673***            | .355***  | -3.653**         | -1.197   |
| Incidental recall          | -.083*** | .072               | .038*    | -.806*           | -1.058*  |

Note: a. Log transformed scores were used; \*  $p < .05$ , \*\*  $p < .01$ ; \*\*\*  $p < .001$

Table 5b. Regression coefficients, constants, and standard errors for the final, pared down regression models, and Z-scores for the normative sample of HIV-uninfected women

|                            | Age      | Years of education | WRAT-3   | African American | Hispanic | Constant | SE    | Z mean | Z SD |
|----------------------------|----------|--------------------|----------|------------------|----------|----------|-------|--------|------|
| Trails A time <sup>a</sup> | .006***  | -.014*             | -.007**  | .097**           | 0        | 3.729    | .358  | -.0361 | .996 |
| Trails B time <sup>a</sup> | .009***  | -.020**            | -.017*** | .093**           | 0        | 4.982    | .362  | .0503  | .996 |
| Symbol Digit total         | -.349*** | .694***            | .361***  | -2.853**         | 0        | 35.679   | 9.571 | -.0017 | .996 |
| Incidental recall          | -.085*** | 0                  | .048**   | -.843*           | -1.164** | 6.537    | 2.581 | -.0004 | .996 |

Note: a. Log transformed scores were used; \*  $p < .05$ , \*\*  $p < .01$ ; \*\*\*  $p < .001$
